# Supplementary material for: Machine learning to detect melanoma exploiting nuclei morphology and Spatial organization
Source: Springer Nature journal article supplement (doi:10.1038/s41598-025-02913-z), 2025-07-01
Supplement: MOESM1 [file 41598_2025_2913_MOESM1_ESM.docx]

**Machine learning to detect melanoma exploiting nuclei morphology and spatial organization**

Giulia Veronesi a, b, †, Nico Curti c, †, Aldo Gardini d, *, Giulia Querzoli e, Gastone Castellani a, ‡, Emi Dika a, b, ‡

a *Department of Medical and Surgical Sciences, University of Bologna, 40126 Bologna (Italy)*

b *Oncologic Dermatology Unit, IRCCS, Azienda Ospedaliero Universitaria Bologna, 40138 Bologna (Italy)*

c *Department of Physics and Astronomy, University of Bologna, 40127 Bologna (Italy)*

d *Department of Statistical Sciences, University of Bologna, 40126 Bologna (Italy)*

*e Pathology Unit, IRCCS Azienda Ospedaliero-Universitaria di Bologna, 40126 Bologna (Italy)*

† Both authors contributed equally to this work

* Corresponding author ([aldo.gardini@unibo.it](mailto:aldo.gardini@unibo.it))

‡ Both authors contributed equally to this work and share seniorship

**Supplementary Materials**

**Nuclei Features**

The components identified by the segmentation algorithm applied on WSI images, i.e. the nuclei, were characterized according to several morphological (16) and textural (37) features. In ***Sup Tab 1*** below we reported the details about the extracted features.

**Sup Tab 1 | Nuclei features description.** Description of the morphological and textural features extracted from each component, i.e. nucleus, identified by the segmentation algorithm. The entire set of features were quantified using OpenCV and scikit-image Python packages.

|  | **Feature Name** | **Description** |
| --- | --- | --- |
| Morphology | Area | Contour area of the identified component |
| Perimeter | Contour perimeter of the identified component |
| Equivalent diameter | Diameter of a circle with an equal aggregate sectional area |
| Aspect Ratio | Ratio between width and height of the component bounding box |
| Extent | Ratio between component area and related bounding box area |
| Circularity | Measure of how closely the shape of an object approaches that of a mathematically perfect circle |
| Convexity | Ratio between area of component area and related convex hull area |
| Major axis | Major axis of the |
| Minor axis | Minor axis of |
| Eccentricity | Ratio between minor and major axis |
| Convex Hull area | Area of the convex hull of the component |
| Convex Hull perimeter | Perimeter of the convex hull of the component |
| Elongation | Ratio between the area and the number of erosions required for the complete remotion of the object |
| Circular variance | The circular variance is the proportional mean-squared error with respect to solid circle |
| Elliptic variance | Elliptic variance is defined similarly to the circular variance. An ellipse is fitted to the shape (instead of a circle) and the mean-squared error is measured |
| Sphericity | Degree to which an object approaches the shape of a "sphere" |
| Texture | Average R | Average value of red channel in the component |
| Average G | Average value of green channel in the component |
| Average B | Average value of blue channel in the component |
| Standard Dev R | Standard deviation value of the red channel in the component |
| Standard Dev G | Standard deviation value of the green channel in the component |
| Standard Dev B | Standard deviation value of the blue channel in the component |
| Minimum R | Minimum value of the red channel in the component |
| Minimum G | Minimum value of the green channel in the component |
| Minimum B | Minimum value of the blue channel in the component |
| Maximum R | Maximum value of the red channel in the component |
| Maximum G | Maximum value of the green channel in the component |
| Maximum B | Maximum value of the blue channel in the component |
| Average H | Average value of hue channel in the component |
| Average S | Average value of saturation channel in the component |
| Average V | Average value of V channel in the component |
| Standard Dev H | Standard deviation value of the hue channel in the component |
| Standard Dev S | Standard deviation value of the saturation channel in the component |
| Standard Dev V | Standard deviation value of the V channel in the component |
| Minimum H | Minimum value of the hue channel in the component |
| Minimum S | Minimum value of the saturation channel in the component |
| Minimum V | Minimum value of the V channel in the component |
| Maximum H | Maximum value of the hue channel in the component |
| Maximum S | Maximum value of the saturation channel in the component |
| Maximum V | Maximum value of the V channel in the component |
| Haralick’s features 1 | Standard 13 Haralick’s features for texture analysis |

**Algorithm settings and additional outputs**

In this section, we first list the hyperparameter settings used for the algorithms and introduce additional classification methods to benchmark the proposed solution. We begin with the methods discussed in the paper:

- RDA: The procedure was performed using the *rda()* function from the *klaR* package, which depends on two hyperparameters. We set *γ = 0.32* and *λ = 0.94*, values obtained through a cross-validation study.
- LDA: The stepwise algorithm is implemented using the *greedy.wilks()* function from *klaR*, with the *niveau* parameter set to *0.15*. The *lda()* function from MASS does not require hyperparameter tuning.

As a further benchmark, we consider:

- Random Forest (RF): The procedure was performed using the default settings of the *randomForest()* function from the *randomForest* package 2 (v4.7).
- Boosting: The *randomForest()* function was run with the setting *mtry = P*, where *P* is the number of variables used in the classification procedure.
- Support Vector Machine (SVM): Implemented using the *svm()* function from the *e1071* package. A radial kernel was used, with the cost parameter set to *10* and *γ = 0.05*, as recommended by a cross-validation study.

Finally, ***Sup Tab 2*** contains the metrics from the MCCV study including also the further methods described in this section.

**Sup Tab 2 | Performances of classification methods.** Average values of the performance indicators evaluated in the Monte Carlo Cross-Validation study including additional methods.

|  | **Accuracy** | **Sensitivity** | **Precision** | **MCC** | **F1 Score** |
| --- | --- | --- | --- | --- | --- |
| **LDA** | 0.904 | 0.844 | 0.865 | 0.783 | 0.842 |
| **RDA** | 0.877 | 0.850 | 0.796 | 0.730 | 0.808 |
| **Boosting** | 0.804 | 0.708 | 0.716 | 0.566 | 0.688 |
| **RF** | 0.833 | 0.726 | 0.764 | 0.620 | 0.725 |
| **SVM** | 0.870 | 0.826 | 0.785 | 0.706 | 0.792 |

**References**

1. Haralick, R. M., Shanmugam, K. & Dinstein, I. Textural Features for Image Classification. *IEEE Trans. Syst., Man, Cybern.* **SMC-3**, 610–621 (1973).

2. Liaw, A. & Wiener, M. Classification and Regression by RandomForest. *Forest* **23**, (2001).
